# Supplementary material
Source: Copernicus journal article supplement (doi:10.5194/gc-9-261-2026)

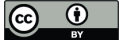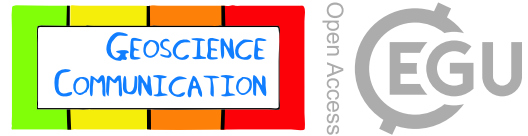

*Supplement of*

**Make the invisible visible: reveal the magnetic field and air pollution to foster engagement in a community-based participatory research project**

**Melina Macouin et al.**

*Correspondence to:* Melina Macouin ([melina.macouin@cnrs.fr](mailto:melina.macouin@cnrs.fr))

The copyright of individual parts of the supplement might differ from the article licence.

Figure S1

Worksheet provided to participants (in French).

Participants are instructed to first record magnetic susceptibility measurements (*Susceptibilité magnétique*) for samples 1 to 5 (N°) in the provided table. Subsequently, they select colored stickers corresponding to the measured values (see S.I. 2) and affix them to the numbered circles on the map to visualize spatial variations. Map data: © Google Map 2019

NanoEnvi, ANR BREATHE, CNRS  
Géosciences Environnement Toulouse, Nuit des chercheurs 2023  
contact : melina.macouin@get.omp.eu

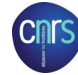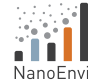

### Mesures de susceptibilité magnétique

|                           |  |  |  |  |  |  |  |
|---------------------------|--|--|--|--|--|--|--|
| N°                        |  |  |  |  |  |  |  |
| Susceptibilité magnétique |  |  |  |  |  |  |  |

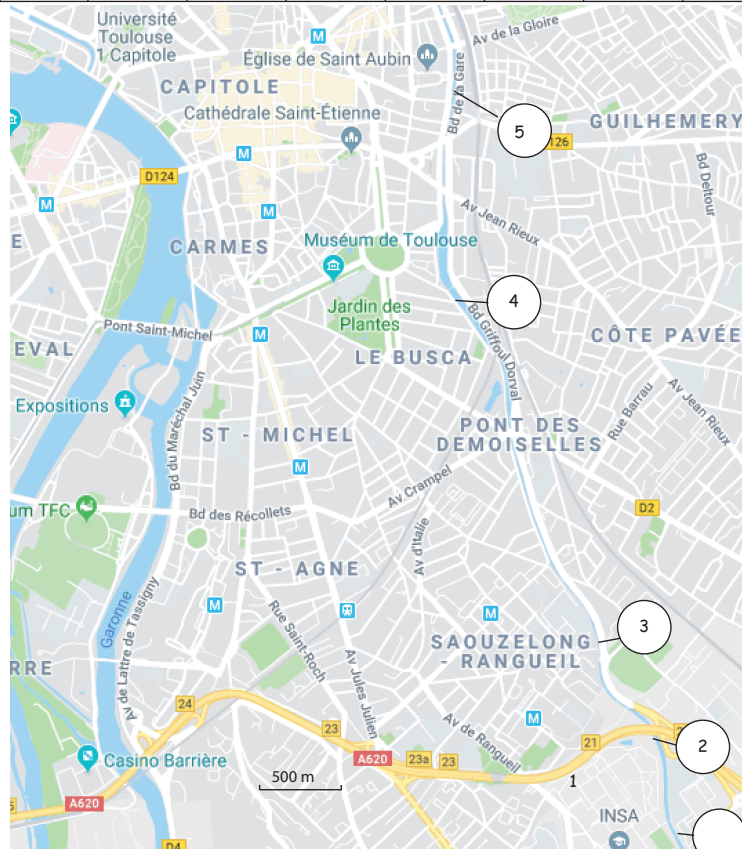

**Figure S2**  
**Color scale for magnetic susceptibility measurements (in French).**

Participants use this scale to match measured susceptibility values with corresponding colors, which are then plotted on the map (S.I. 1) using colored stickers.

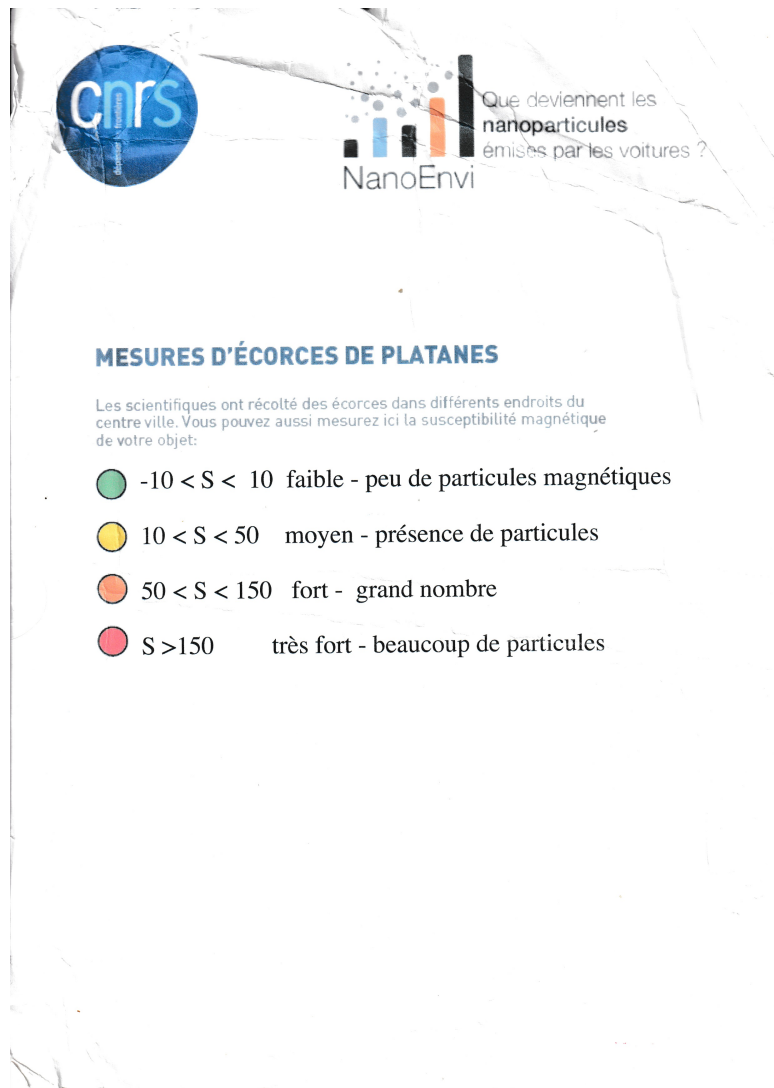

Supplement: Supplementary file 1 [file gc-9-261-2026-supplement.pdf]
